# Supplementary material for: The Outer Pore and Selectivity Filter of TRPA1
Source: PubMed Central journal article supplement (PMC5100928; doi:10.1371/journal.pone.0166167), 2016-11-08
Supplement: pone.0166167.s001.pdf [file pone.0166167.s001.pdf]

| Construct | $K_{D,0}$ mV     | $\delta$         | n                | $k_{-1}/k_1$      | $k_2/k_1$        |
|-----------|------------------|------------------|------------------|-------------------|------------------|
| WT        | $0.6 \pm 0.01$   | $0.51 \pm 0.001$ | $0.39 \pm 0.001$ | $0.063 \pm 0.001$ | $0.58 \pm 0.01$  |
| E920A     | $2 \pm 0.01$     | $0.50 \pm 0.001$ | $0.63 \pm 0.002$ | $0.15 \pm 0.003$  | $1.9 \pm 0.01$   |
| D915A     | $6.1 \pm 0.06$   | $0.54 \pm 0.001$ | $0.34 \pm 0.002$ | $0.021 \pm 0.008$ | $6.1 \pm 0.05$   |
| D915E     | $0.23 \pm 0.006$ | $0.49 \pm 0.003$ | $0.36 \pm 0.002$ | $0.011 \pm 0.001$ | $0.21 \pm 0.005$ |
