# Supplementary material for: The Outer Pore and Selectivity Filter of TRPA1
Source: PubMed Central journal article supplement (PMC5100928; doi:10.1371/journal.pone.0166167), 2016-11-08
Supplement: pone.0166167.s002.pdf [file pone.0166167.s002.pdf]

| Construct | RuRed IC50 |         | Gd <sup>3+</sup> IC50<br>( $\mu$ M) | Gd <sup>3+</sup> n |
|-----------|------------|---------|-------------------------------------|--------------------|
|           | (nM)       | RuRed n |                                     |                    |
| wt        | 45.2       | 0.54    | 7.89                                | 0.71               |
| E930Q     | 43.5       | 0.62    |                                     |                    |
| E924A     | 44         | 0.88    |                                     |                    |
| E920A     | 281        | 1.11    | 28.3                                | 0.86               |
| D915A     | 10100      | 1.35    | 354                                 | 0.66               |
